# Supplementary material for: The diurnal cycle and temperature dependence of crystal shapes in ice clouds from satellite lidar polarized measurements
Source: Copernicus journal article supplement (doi:10.5194/egusphere-2025-5018), 2025-11-14
Supplement: Supplementary file [file egusphere-2025-5018-RC2-supplement.pdf]

While in essence this is implied in Sect. 2.2 (and is evident in Sato and Okamoto), more of this information could be presented so that the reader can more clearly understand what the statistics in this paper actually mean.

2. The paper would be more interesting if it included images for the different ice particle shapes being evaluated. Voronois ice particles are especially important since many readers may not be familiar with them, and several images may be justified due to their varied, complex shapes.
3. Lines 251-252: Please cite Ken Sassen's work from the 1990's here. Ken was the first to relate lidar depolarization ratios to cloud particle shape as per my understanding, and he has many published papers on this topic.

Technical Comments:

1. Line 69: This line contains "**1.1.1 Subsection (as Heading 3)**" and should be deleted.
2. Line 92: ATB => TAB?
3. Line 107: -80°S => -80°C ?
